# Supplementary material for: Connecting data and expertise: a new alliance for biodiversity knowledge
Source: PubMed Central journal article supplement (PMC6420472; doi:10.3897/bdj.7.e33679), 2019-03-08
Supplement: bdj-07-e33679-s002.pdf [file bdj-07-e33679-s002.pdf]

## Annex B - List of GBIC2 Attendees

Aaron Wilton, Landcare Research, New Zealand  
Alex Asase, University of Ghana, Ghana  
Alex Mitchell, European Bioinformatics Institute, United Kingdom  
Ana Casino, Consortium of European Taxonomic Facilities, Belgium  
Anabela Plos, Museo Argentino de Ciencias Naturales, Argentina  
Anders Finstad, Norwegian University of Technology and Science, Norway  
Anders Telenius, Naturhistoriska Riksmuseet, Sweden  
Andrea Hahn, GBIF Secretariat, Denmark  
Andrea Portela, Ministério da Ciência, Tecnologia, Inovações e Comunicações, Brazil  
Andrew Rodrigues, GBIF Secretariat, Denmark  
Andy Bentley, Kansas University Biodiversity Institute, United States  
Anne-Sophie Archambeau, GBIF France, France  
Bob Corrigan, Encyclopedia of Life, United States  
Brigitte Baptiste, Instituto de Investigación de Recursos Biológicos Alexander von Humboldt, Colombia  
Carolyn Sheffield, Smithsonian Institution, United States  
Chih-Jen Ko, Academia Sinica, Taiwan  
Chloe Chester, Museum National d'Histoire Naturelle, France  
Chris Gentle, Western Australian Biodiversity Science Institute, Australia  
Christian Elloran, Asean Biodiversity, Philippines  
Christoph Haeuser, Museum für Naturkunde, Germany  
Corinna Gries, University of Wisconsin, United States  
Cristina Villaverde, GBIF Spain, Spain  
Daniel Noesgaard, GBIF Secretariat, Denmark  
Dave Martin, Atlas of Living Australia, United Kingdom  
David Patterson, WWF UK, United Kingdom  
David Thau, Google / WWF, United States  
Dimitris Koureas, DiSSCo, Netherlands  
Dirk Steinke, Centre for Biodiversity Genomics, Canada  
Dmitry Schigel, GBIF Secretariat, Denmark  
Don Doering, JRS Foundation, United States  
Donald Hobern, GBIF Secretariat, Denmark  
Edwin van Huis, Naturalis, Netherlands  
Eun-Shik Kim, Kookmin University, Korea  
Fatima Parker-Allie, South African National Biodiversity Institute, South Africa  
Francois Hissel, Agence française pour la biodiversité, France  
Gil Nelson, iDigBio, United States  
Gregoire Dubois, Joint Research Centre, Italy  
Hamish Holewa, Atlas of Living Australia, Australia  
Ina Smith, Academy of Science of South Africa, South Africa  
Isayvani Naicker, African Academy of Sciences, Kenya  
Ismaël Mejía, Apache Software Foundation, France  
James Hanken, Museum of Comparative Zoology, Harvard University, United States  
James Macklin, Agriculture Canada, Canada  
Jerry Lanfear, ELIXIR, United Kingdom  
Jim Beach, Kansas University Biodiversity Institute, United States  
John Wieczorek, Museum of Vertebrate Zoology, University of California Berkeley, Argentina  
Jose Fortes, iDigBio, United States

Juan Miguel Gonzalez Aranda, Lifewatch EU, Spain  
Junko Shimura, Convention on Biological Diversity, Canada  
Keping Ma, Chinese Academy of Sciences, China  
Kevin Thiele, Australian Academy of Science, Australia  
Kyle Copas, GBIF Secretariat, Denmark  
Laetitia Navarro, German Centre for Integrative Biodiversity Research, Germany  
Larry Page, iDigBio, United States  
Laura Russell, GBIF Secretariat, Denmark  
Lawrence Monda, National Museums of Kenya, Kenya  
Leonard Krishtalka, Kansas University Biodiversity Institute, United States  
Liliana Ballesteros, Muséum national d'Histoire naturelle, France  
Lyubo Penev, Pensoft, Bulgaria  
Maria Uhle, Belmont Forum, United States  
Marta Iturribarria, Gobierno Vasco, Spain  
Mélianie Raymond, GBIF Secretariat, Denmark  
Melodie McGeoch, Monash University, Australia  
Michel Guiraud, Muséum national d'Histoire naturelle, France  
Michelle Price, Consortium of European Taxonomic Facilities, Switzerland  
Mikhail Kalyakin, Zoological Museum of Moscow University, Russia  
Nicky Nicolson, Royal Botanic Gardens Kew, United Kingdom  
Nicole Kearney, Museums Victoria, Australia  
Olaf Banki, Catalogue of Life Plus project, Netherlands  
Ole Seberg, Statens Naturhistoriske Museum, Denmark  
Patricia Koleff, CONABIO, Mexico  
Paula Zermoglio, TDWG, Argentina  
Peter Desmet, Instituut Natuur- En Bosonderzoek, Belgium  
Peter Schalk, Catalogue of Life, Netherlands  
Philippe Grandcolas, Muséum national d'Histoire naturelle, France  
Piotr Tykarski, University of Warsaw, Poland  
Prabhakar Rajagopal, Strand Life Sciences, India  
Quentin Groom, Botanic Garden Meise, Belgium  
Ramona Walls, University of Arizona, United States  
Riza Batista-Navarro, University of Manchester, United Kingdom  
Rob Guralnick, Florida Museum of Natural History, United States  
Rob Zschernitz, The Field Museum, United States  
Robert Hanisch, National Institute of Standards and Technology, United States  
Robert Montoya, Indiana University, United States  
Roland Roberts, National Science Foundation, United States  
Roseli Pellens, Muséum national d'Histoire naturelle, France  
Scott Loarie, iNaturalist, United States  
Serge Belongie, Cornell University, United States  
Sharon Grant, The Field Museum, United States  
Shyama Pagad, IUCN SSG Invasive Species Specialist Group, New Zealand  
Sky Bristol, Ocean Biogeographic Information System, United States  
Takeshi Osawa, Tokyo Metropolitan University, Japan  
Talia Karim, University of Colorado, United States  
Tanya Abrahamse, GBIF Governing Board, South Africa  
Thomas Hickler, Senckenberg Biodiversity and Climate Research Centre,  
Germany  
Thomas Pape, International Commission on Zoological Nomenclature,  
Denmark  
Tim Hirsch, GBIF Secretariat, Denmark  
Tim Robertson, GBIF Secretariat, Denmark

Tsuyoshi Hosoya, National Museum of Nature and Science, Japan  
Walter Berendsohn, Botanischer Garten und Botanisches Museum Berlin, Germany  
Wim Hugo, ICSU World Data System, South Africa  
Wouter Addink, Naturalis, Netherlands  
Yichuan Shi, UNEP World Conservation Monitoring Centre, United Kingdom
